# Supplementary material
Source: HighWire-hosted journal article supplement (https://thorax.bmj.com/content/74/8/761)
Supplement: inline-supplementary-material-1 [file inline-supplementary-material-1.pdf]

### Supplementary Table S1

**Complete case analysis: Table 4 Regression coefficients, OR (95% CI) and SE for covariates in the final model for the probability of lung cancer in pulmonary nodules.**

| Covariates                        | $\beta$ -coefficient | Standard error | OR (95%CI)          | <i>P</i> -values |
|-----------------------------------|----------------------|----------------|---------------------|------------------|
| Intercept                         | -2.4131              | 1.4291         | -                   | 0.091            |
| Age (years)                       | -0.0248              | 0.0188         | 0.976(0.940-1.012)  | 0.186            |
| Gender (female)                   | 0.5363               | 0.1619         | 1.710(1.245-2.348)  | <0.0001          |
| Asthma                            | -0.9266              | 0.2019         | 0.396(0.267-0.588)  | <0.0001          |
| Bronchitis                        | 1.7979               | 0.1981         | 6.037(4.059-8.901)  | <0.0001          |
| Asbestos exposure                 | 0.7507               | 0.1697         | 2.119(1.519-2.954)  | <0.0001          |
| Previous malignancy               | 0.5021               | 0.1983         | 1.652(1.120-2.437)  | 0.011            |
| Family history of cancer          |                      |                |                     |                  |
| Early onset *                     | 2.0818               | 0.2019         | 8.019(5.398-11.912) | <0.0001          |
| Late onset*                       | 1.5308               | 0.1964         | 4.622(3.145-6.792)  | <0.0001          |
| Smoking duration (years)          | 0.0573               | 0.0104         | 1.059(1.038-1.081)  | <0.0001          |
| Forced vital capacity (Litres)    | -1.1718              | 0.1080         | 0.310(0.251-0.383)  | <0.0001          |
| Nodule type (solid as reference)  |                      |                |                     |                  |
| Nonsolid                          | 1.5866               | 0.3670         | 4.887(2.380-10.033) | <0.0001          |
| Part solid                        | 0.4941               | 0.2870         | 1.639(0.934-2.876)  | 0.085            |
| Nodule location                   |                      |                |                     |                  |
| Upper vs. middle or lower lobe    | -0.2373              | 0.1604         | 0.792(0.579-1.085)  | 0.147            |
| Nodular volume (mm <sup>3</sup> ) | 0.000863             | 0.000117       | 1.001(1.000-1.001)  | <0.0001          |

Table S1 is complete case analyses – which is a replicate of the odds ratios and beta coefficients of the data with missing data, which was found to be very similar to that with multiple imputations.
